# Supplementary material for: Generation of a highly efficient and tissue-specific tryptophan hydroxylase 1 knockout mouse model
Source: PubMed Central journal article supplement (PMC6281741; doi:10.1038/s41598-018-36097-6), 2018-12-05

## **Generation of a highly efficient and tissue-specific tryptophan hydroxylase 1 knockout mouse model**

Hyeongseok Kim<sup>1, #</sup>, Yeong Gi Kim<sup>1, #</sup>, Wonsuk Choi<sup>1</sup>, Joon Ho Moon<sup>1</sup>, Inseon Hwang<sup>2</sup>,  
Kyuho Kim<sup>1</sup>, Vijay K. Yadav<sup>3</sup>, Gerard Karsenty<sup>3</sup>, Ji-Seon Jeong<sup>4, \*</sup>, and Hail Kim<sup>1, 2, \*</sup>

<sup>1</sup>Graduate School of Medical Science and Engineering, Korea Advanced Institute of Science and Technology, Daejeon 34141, Republic of Korea

<sup>2</sup>Biomedical Science and Engineering Interdisciplinary Program, Korea Advanced Institute of Science and Technology, Daejeon 34141, Republic of Korea

<sup>3</sup>Department of Genetics and Development, Columbia University Medical Center, New York, NY 10032, USA

<sup>4</sup>Center for Bioanalysis, Division of Chemical and Medical Metrology, Korea Research Institute of Standards and Science, Daejeon 34113, Republic of Korea

# These authors contributed equally to this work

\* Corresponding authors:

Hail Kim, M.D., Ph.D.

Graduate School of Medical Science and Engineering, Korea Advanced Institute of Science and Technology

291 Daehak-ro, Yuseong-gu, Daejeon 34141, Republic of Korea

e-mail: hailkim@kaist.edu

Ji-Seon Jeong, Ph.D.

Korea Research Institute of Standards and Science

267 Gajeong-ro, Yuseong-gu, Daejeon 34113, Republic of Korea

e-mail: [jsjeong@kriss.re.kr](mailto:jsjeong@kriss.re.kr)

## Supplementary Table

**Supplementary Table S1. Sequence of the primers used for genotyping and quantitative RT-PCR**

| Name                | Sequence                  |
|---------------------|---------------------------|
| Tph1 forward        | TTCTGACCTGGACTTCTGCG      |
| Tph1 reverse        | GGGGTCCCATGTTTGTAGT       |
| 36B4 forward        | TCCAGGCTTTGGGCATCA        |
| 36B4 reverse        | CTTTATCAGCTGCACATCACTCAGA |
| CSD-Tph1-F          | TCAACATAGCCCTGAGCTCCTTAGC |
| CSD-neo-F           | GGGATCTCATGCTGGAGTTCTTCG  |
| CSD-Tph1-ttR        | ATGCAAAGCTCCTACAGTGACAACG |
| CSD-Tph1-R          | CACATTCCTTGCAACTCTGCTACC  |
| Tph1 exon1 forward  | GACTCTTTAAACTCCAGTGG      |
| Tph1 exon11 reverse | TCACACACTGGGCCACCTGG      |

## Supplementary Figure

### Supplementary Figure S1. Sequence of splicing variant of *Tph1* in *Tph1<sup>tm1Kry</sup>* GKO mice.

(a) Sequence of *Tph1* transcript of wild type mice and KO transcript of *Tph1<sup>tm1Kry</sup>* GKO mice.

Red blocks indicate first ATG of transcript. Purple letters indicate exon 1 of *Tph1*. Red letters indicate exon 2 of *Tph1*. Yellow letters indicate exon 3 of *Tph1*. Green letters indicate exon 4 of *Tph1*.

```
Tph1          GACTCTTTAAACTCCAGTGGCTCTGAGGTGAGTGGGTGAGTGGGATAGCCCCCTCCCTGGG
Tph1tm1Kry GKO variant 1 GACTCTTTAAACTCCAGTGGCTCTGAGGTGAGTGGGTGAGTGGGATAGCCCCCTCCCTGGG
Tph1tm1Kry GKO variant 2 GACTCTTTAAACTCCAGTGGCTCTGAGGTGAGTGG-----
Tph1tm1Kry GKO variant 3 GACTCTTTAAACTCCAGTGGCTCTGAG-----

Tph1          ACATCGGATCAGAAGACTCCCAGCAAGGACGGGATCAACTTCTAGTAGGAACCAGATTCA
Tph1tm1Kry GKO variant 1 ACATCGGATCAGAAGACTCCCAGCAAGGACGGGATCAACTTCTAGTAGGAACCAG-----
Tph1tm1Kry GKO variant 2 -----
Tph1tm1Kry GKO variant 3 -----

                Start codon
Tph1          CCATGATTGAAGACAACAAGGAGAACAAGAGAACAAGACCATTCTCCGAAAGAGGGA
Tph1tm1Kry GKO variant 1 -----
Tph1tm1Kry GKO variant 2 -----
Tph1tm1Kry GKO variant 3 -----

Tph1          -----
Tph1tm1Kry GKO variant 1 -----
Tph1tm1Kry GKO variant 2 -----
Tph1tm1Kry GKO variant 3 -----

Tph1          TCTTCCAGGAGAATCATGTGAGCCTGTTACACATCGAGTCCCGAAATCAAAGCAAAGAA
Tph1tm1Kry GKO variant 1 -----
Tph1tm1Kry GKO variant 2 -----
Tph1tm1Kry GKO variant 3 -----

Tph1          ATTCAGAATTTGAGATATTTGTTGACTGCGACATCAGCCGAGAACAGTTGAATGACATCT
Tph1tm1Kry GKO variant 1 -----
Tph1tm1Kry GKO variant 2 -----
Tph1tm1Kry GKO variant 3 -----

Tph1          TCCCCCTGCTGAAGTCGCACGCCACCGTCTCTCGGTGGACTCGCCCCGATCAGCTCACTG
Tph1tm1Kry GKO variant 1 -----
Tph1tm1Kry GKO variant 2 -----
Tph1tm1Kry GKO variant 3 -----

Tph1          CGAAGGAAGACGTTATGGAGACTGTCCCTTGGTTTCCAAAGAAGATTTCTGACCTGGACT
Tph1tm1Kry GKO variant 1 -----TTATCGAGACTGTCCCTTGGTTTCCAAAGAAGATTTCTGACCTGGACT
Tph1tm1Kry GKO variant 2 -----TTATCGAGACTGTCCCTTGGTTTCCAAAGAAGATTTCTGACCTGGACT
Tph1tm1Kry GKO variant 3 -----TTATCGAGACTGTCCCTTGGTTTCCAAAGAAGATTTCTGACCTGGACT
```

**Supplementary Figure S2. Images of the original western blot in Figure 1g. (a)** Full scanned chemiluminescence image. **(b)** Image of membrane with molecular weight markers. **(c)** Image merged with protein bands and molecular weight markers.

**a**

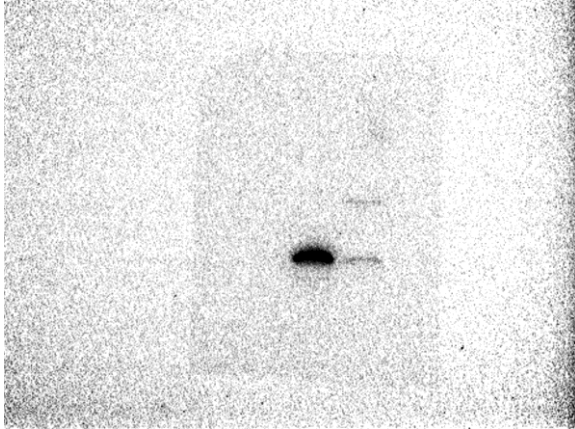

**b**

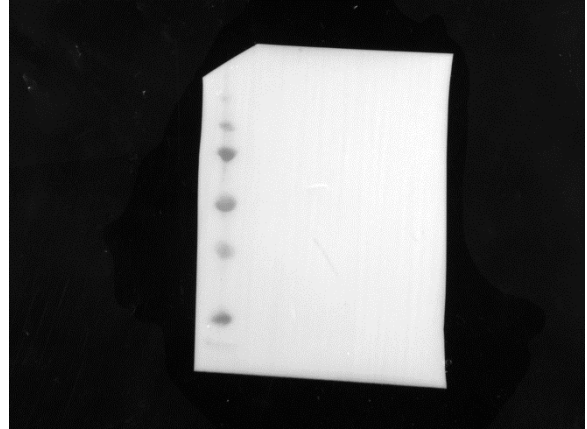

**c**

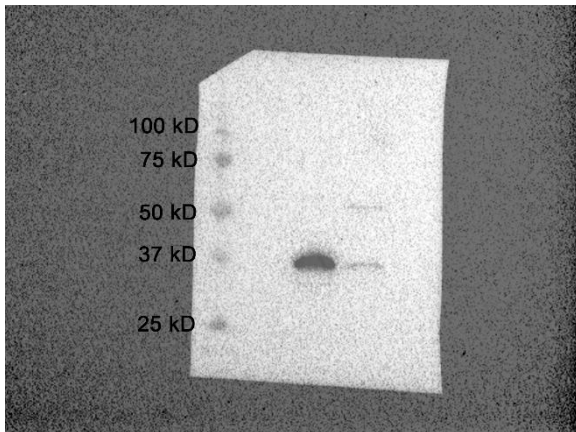

**Supplementary Figure S3. Images of original gels in Figure 1 and 2.** Full scanned image of Figure 1f (a), left panel of Figure 2b (b), right panel of Figure 2b (c), and Figure 2c (d).

**a**

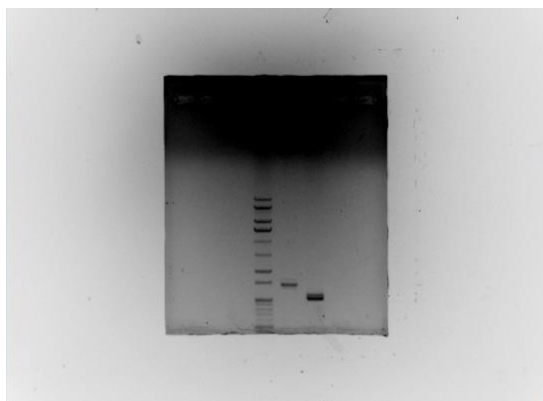

**b**

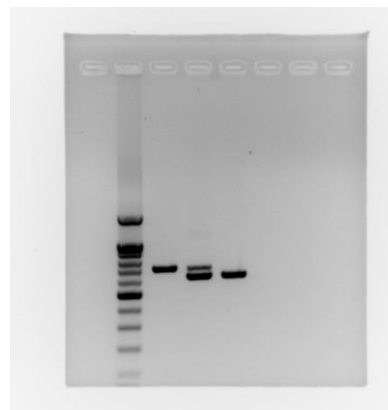

**c**

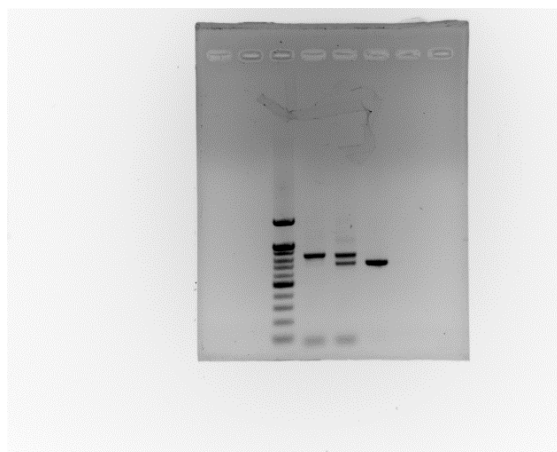

**d**

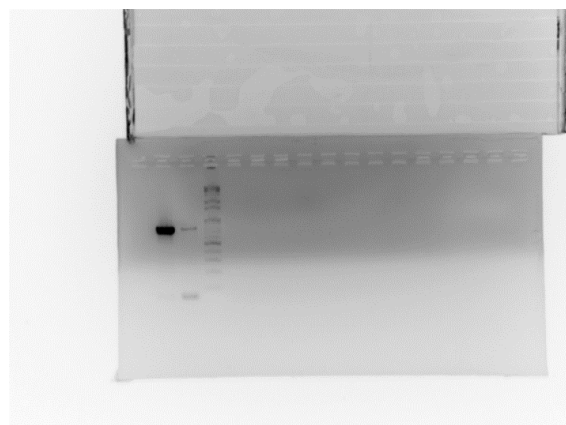

Supplement: 41598_2018_36097_MOESM1_ESM.pdf [file 41598_2018_36097_MOESM1_ESM.pdf]
